# Supplementary material for: Identifying and exploiting gene-pathway interactions from RNA-seq data for binary phenotype
Source: PubMed Central journal article supplement (PMC6423879; doi:10.1186/s12863-019-0739-7), 2019-03-19

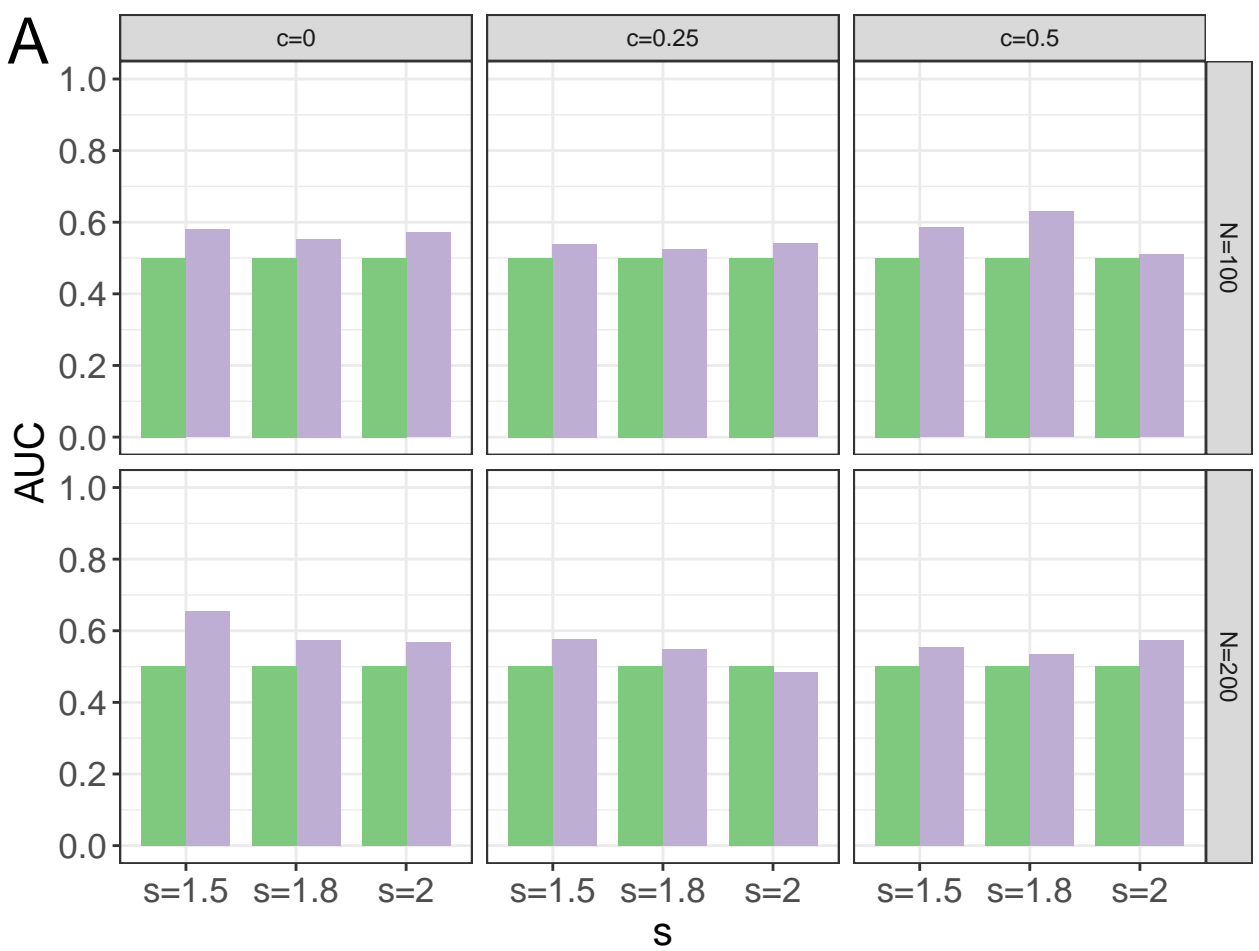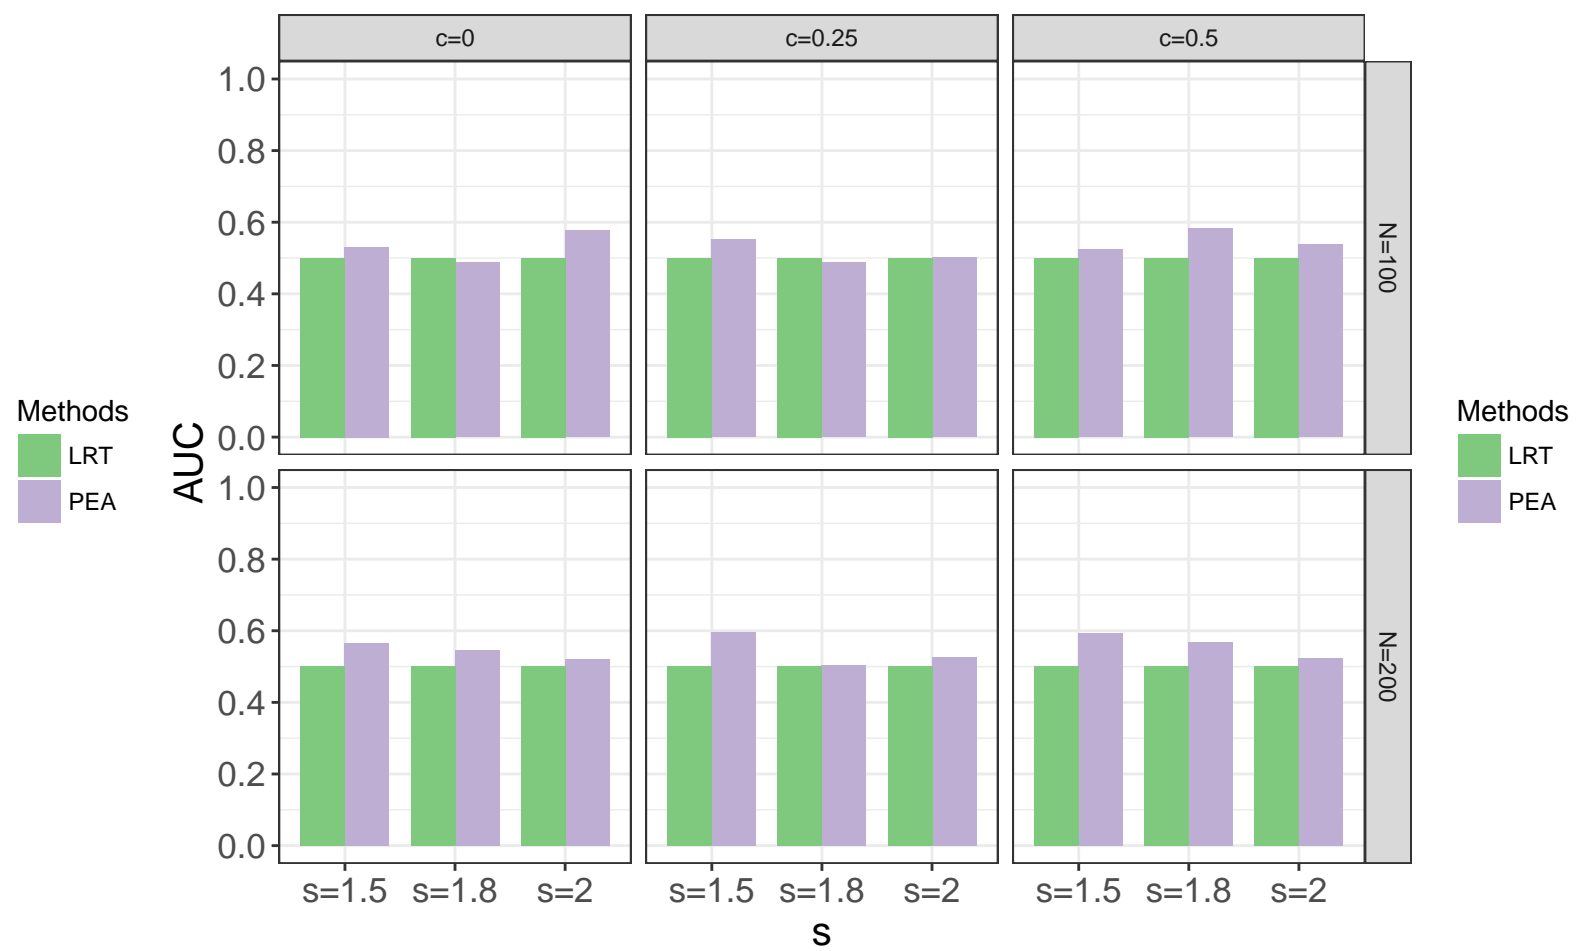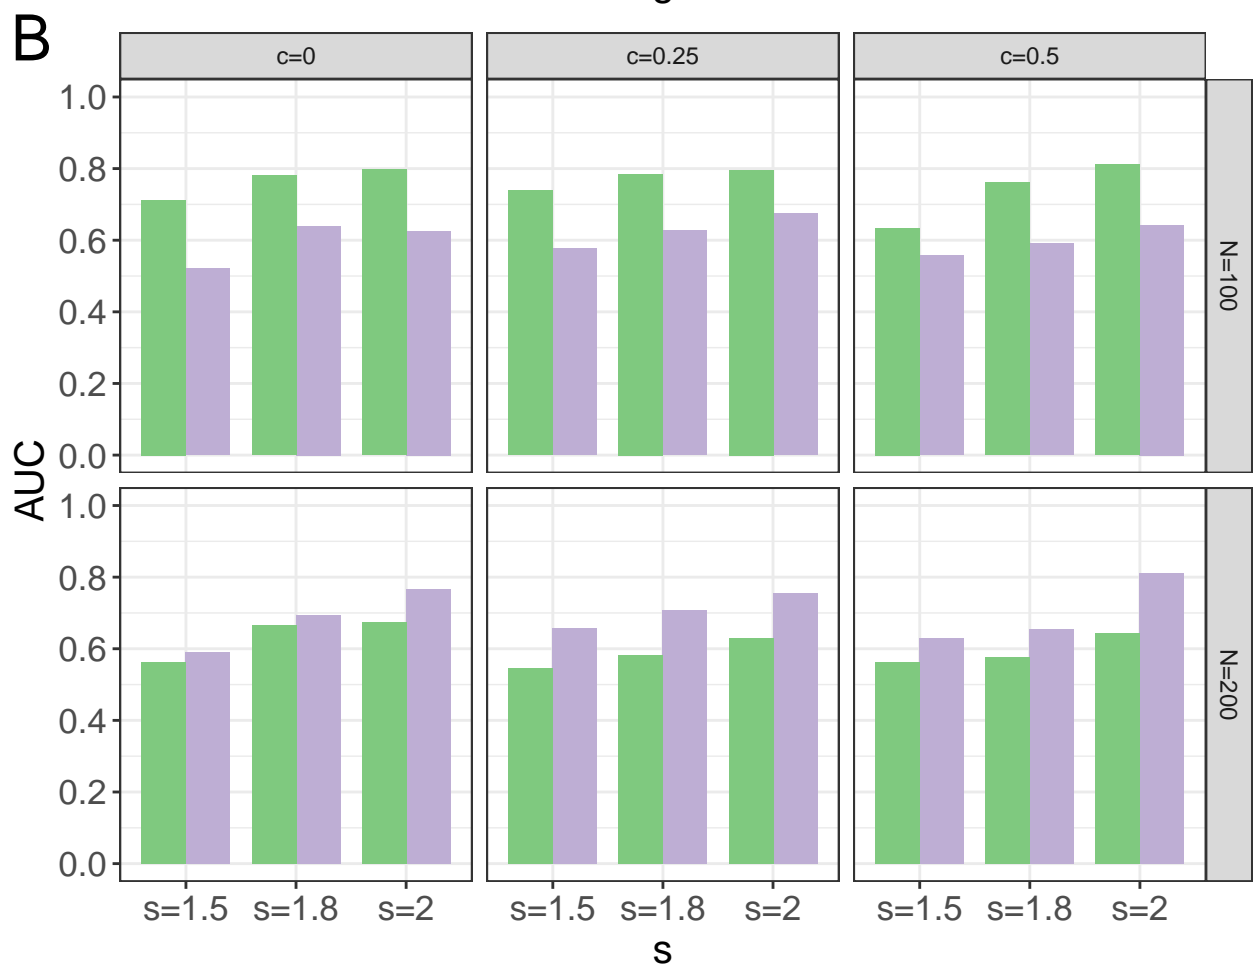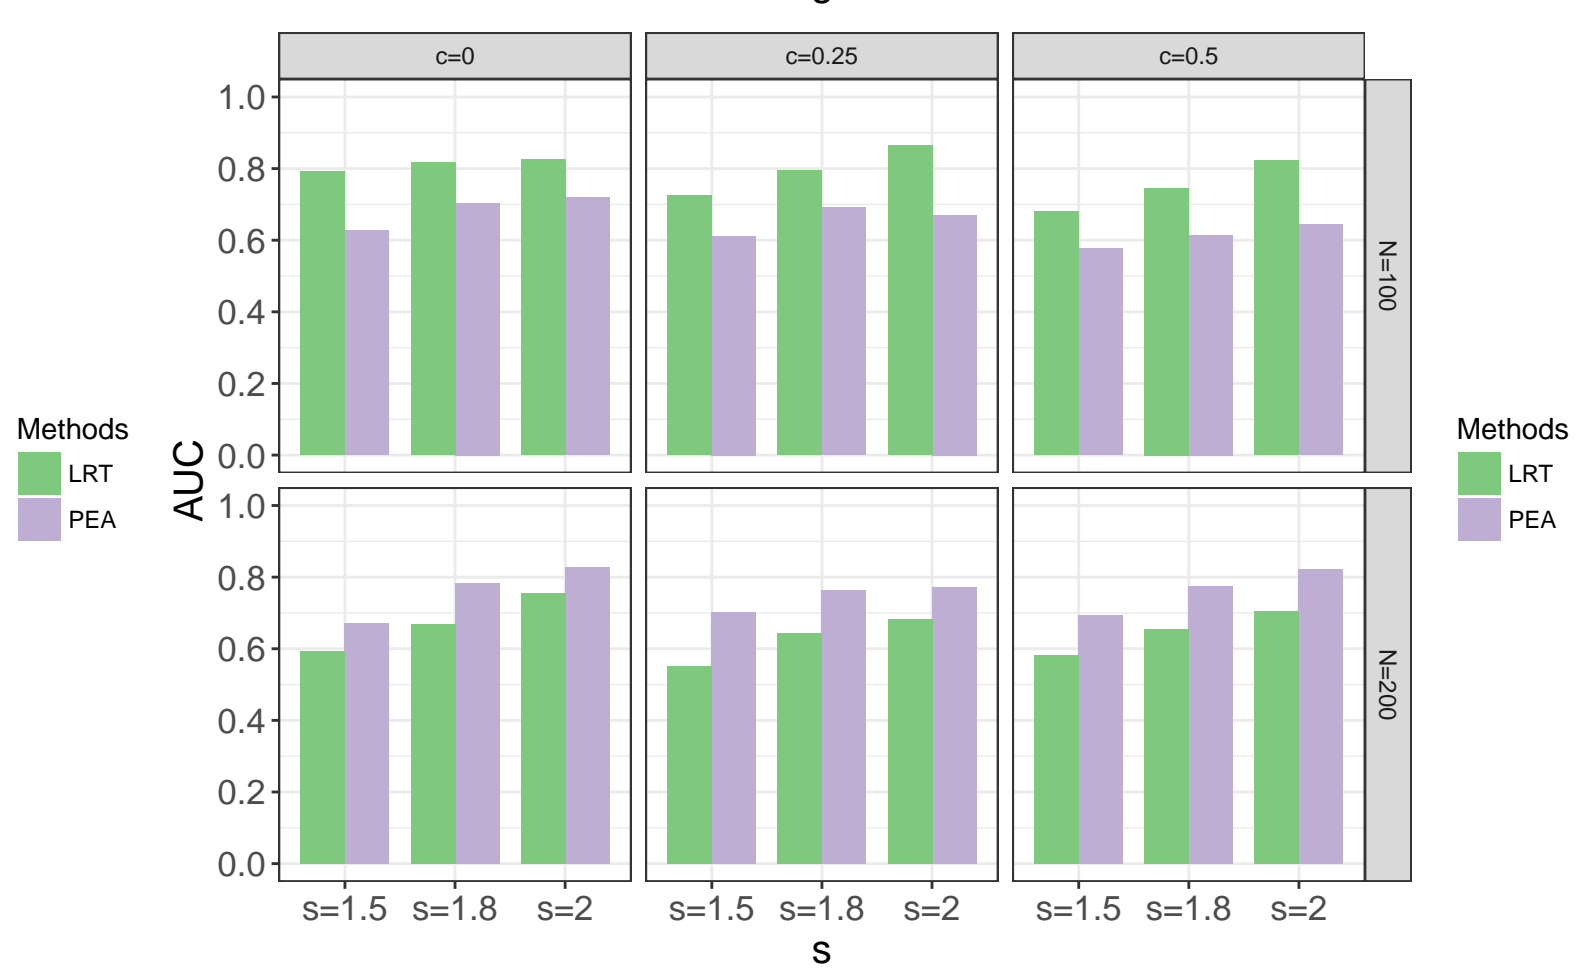

Supplement: 12863_2019_739_MOESM2_ESM.pdf [file 12863_2019_739_MOESM2_ESM.pdf]
